# Supplementary material for: Regulation of Satiety by Bdnf-e2-Expressing Neurons through TrkB Activation in Ventromedial Hypothalamus
Source: MDPI journal article supplement (doi:10.3390/biom13050822), 2023-05-11
Supplement: s1 [file s1]

## Supplementary Materials

**Table S1. Repeat experiments of 12-day food intake in *Bdnf-e1*<sup>-/-</sup> mice.**

| Repeat number | Age (month) | Daily food intake (g)         |                | p value <sup>#</sup> |
|---------------|-------------|-------------------------------|----------------|----------------------|
|               |             | <i>Bdnf-e1</i> <sup>-/-</sup> | WT littermates |                      |
| 1*            | 5           | 4.97±0.14                     | 4.81±0.24      | 0.5464               |
| 2             | 4           | 4.01±0.29                     | 3.68±0.10      | 0.2646               |

\* This repeat experiment was performed by a independent CRO. # Data were presented as mean ± SEM. p value for RM two-way ANOVA.

**Figure S1**

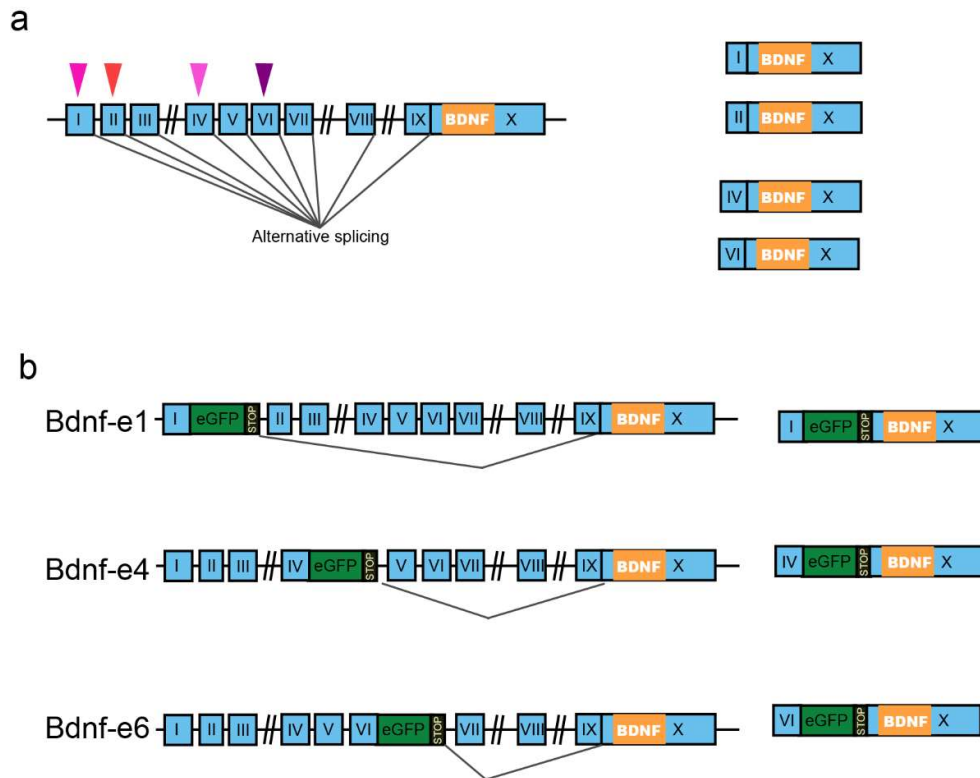

**Figure S1: Schematic diagrams of WT and mutant *Bdnf* gene.**

**(a)** Schematic diagrams for the genomic structure of *Bdnf* and four transcripts driven by promoter I, II, IV and VI. **(b)** Schematic diagrams of splicing and the consequent transcripts in *Bdnf-e1*<sup>-/-</sup>, *Bdnf-e4*<sup>-/-</sup> and *Bdnf-e6*<sup>-/-</sup> mice.

**Figure S2**

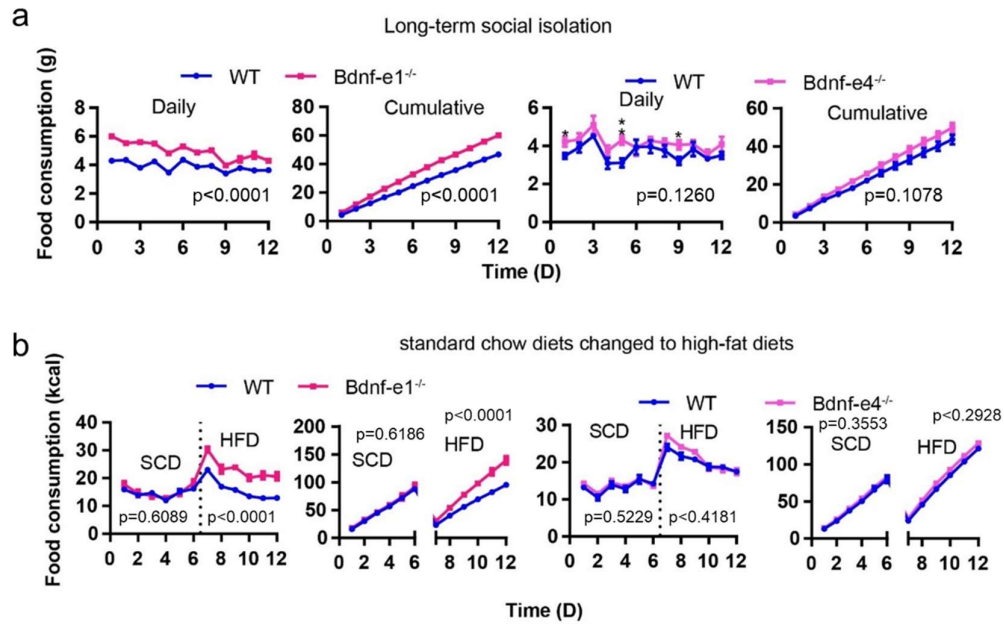

**Figure S2: Food intake analysis under the stress of social isolation or high-fat diets.**

**(a)** Daily and cumulative food consumption of *Bdnf-e1<sup>-/-</sup>*, *Bdnf-e4<sup>-/-</sup>* and WT littermates, after long-term social isolation for more than one month. **(b)** Daily and cumulative food consumption of *Bdnf-e1<sup>-/-</sup>*, *Bdnf-e4<sup>-/-</sup>* and WT littermates, when food was changed from standard chow diets (SCD) to high-fat diets (HFD). p values of two-way RM ANOVA for daily and cumulative data were labeled correspondingly in panels.

**Figure S3**

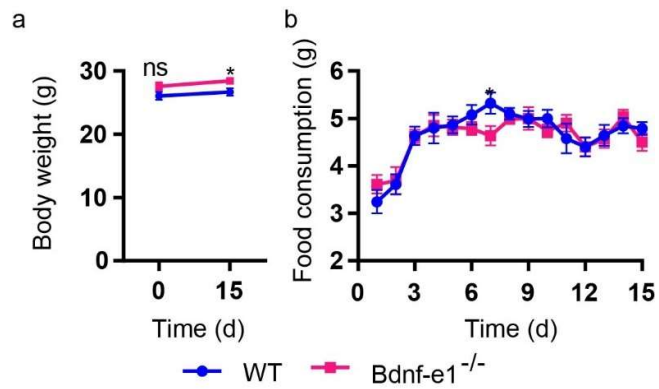

**Figure S3: Food consumption in *Bdnf-e1*<sup>-/-</sup> mice.**

**(a)** Food consumption and body weight of *Bdnf-e1*<sup>-/-</sup> mice and their WT littermates during the onset of obesity (n=8~9/group). **(b)** Food consumption of *Bdnf-e1*<sup>-/-</sup> mice and their WT littermates (n=5~6/group).

**Figure S4**

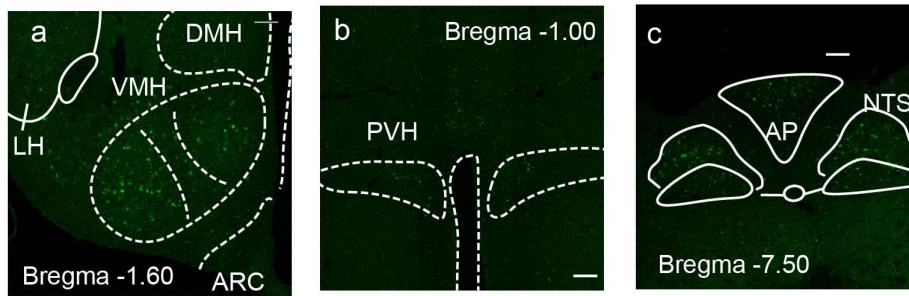

**Figure S4: Large images of pII-driven GFP immunostaining.**  
(a,b) Hypothalamus and (c) DVC. Scale bar: 50  $\mu$ m.

## Figure S5

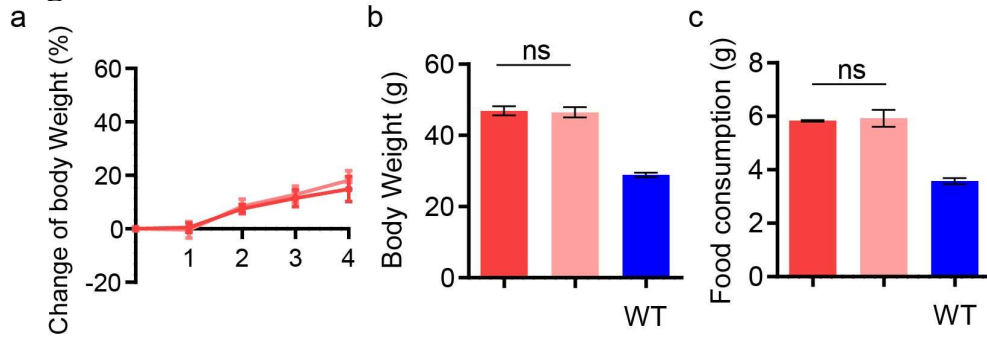

**Figure S5: Injection of AAV- e2-BDNF-Myc into DVC.**

**(a)** Change of body weight after injection of AAVs into DVC in *Bdnf-e2<sup>-/-</sup>* mice (n=3~4/group). p value of two-way RM ANOVA was 0.7783. **(b)** Body weight of *Bdnf-e2<sup>-/-</sup>* mice 4 weeks with injection of AAVs into DVC (n=3~4/group), compared with WT littermates (n=7). **(c)** Average daily food intake of *Bdnf-e2<sup>-/-</sup>* mice 4 weeks with injection of AAVs into DVC (n=3~4/group), compared with WT littermates (n=7).

**Figure S6**

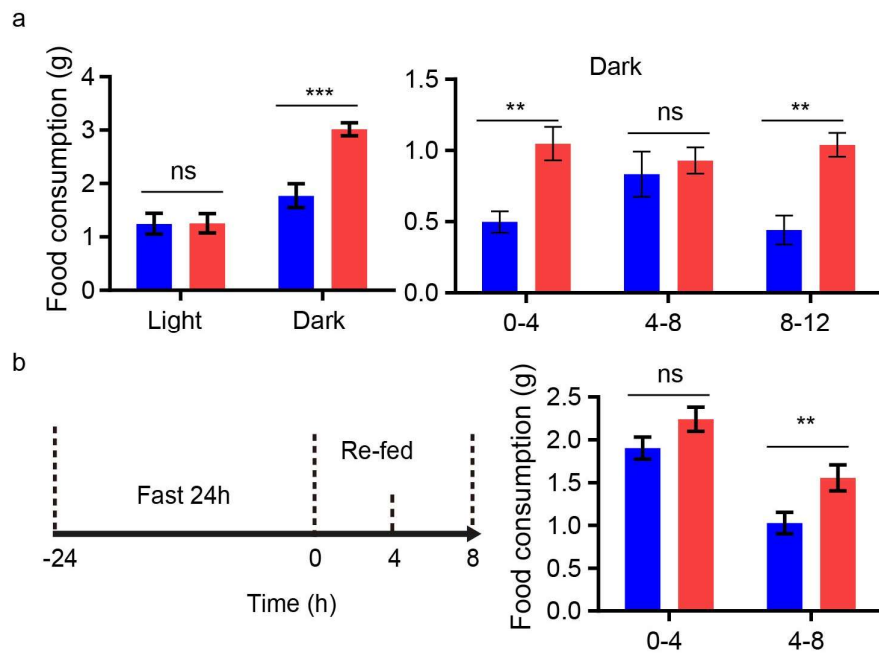

**Figure S6: Less satiety in *Bdnf-e2<sup>-/-</sup>* mice.**

**(a)** Food consumption during different periods. Numbers in the bottom indicate 0-4, 4-8, 8-12 hours during darkness. **(b)** Food consumption after 24h fasting. *Bdnf-e2<sup>-/-</sup>* mice, red; WT mice, blue. n=5~7/group.

**Figure S7**

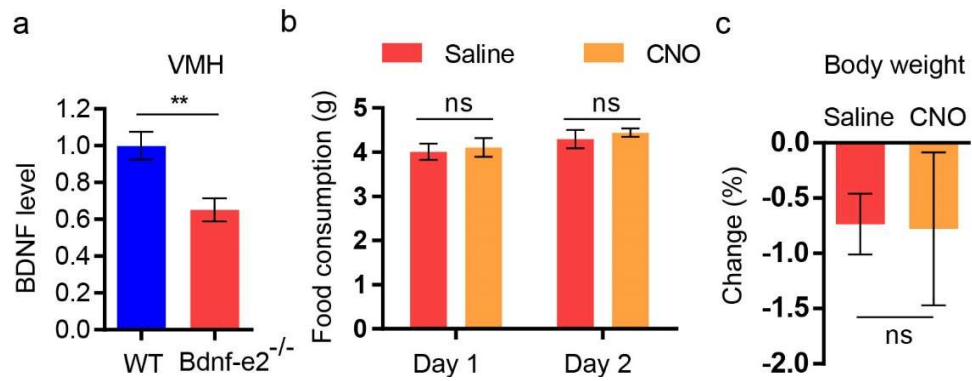

**Figure S7: CNO treatment without AAV infection.**

(a) Relative levels of BDNF protein in VMH of *Bdnf-e2<sup>-/-</sup>* and WT mice. (b,c) Food consumption (b) and change of body weight (c) after treatment of CNO or saline in *Bdnf-e2<sup>-/-</sup>* mice without AAV infection.

**Figure S8**

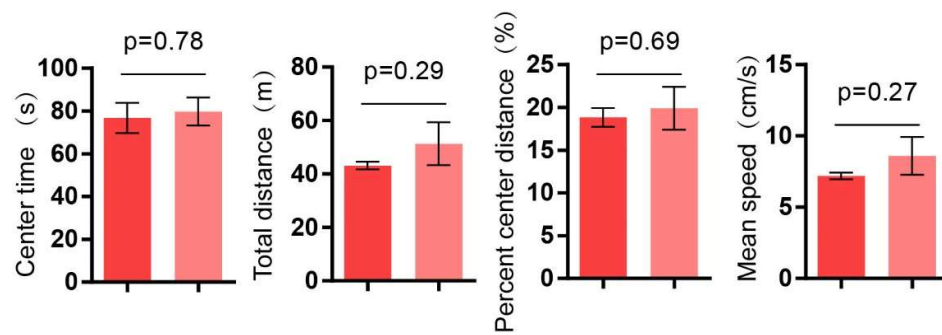

**Figure S8: Effects of TrkB agonistic antibody injected into VMH of *Bdnf-e2<sup>-/-</sup>* mice on open field test.**

Center time, total distance, percent center distance and mean speed during 10 minutes of open field test on the third day of *Bdnf-e2<sup>-/-</sup>* mice injected with TrkB-ago or IgG into VMH (n=4/group).
